# Supplementary material for: Effect of π-bridge units on properties of A–π–D–π–A-type nonfullerene acceptors for organic solar cells
Source: Royal Society of Chemistry journal article supplement (doi:10.1039/c8cp02266f), 2018-01-01
Supplement: c8cp02266f1.pdf [file c8cp02266f1.pdf]

## Electronic Supplementary Information (ESI)

Effect of  $\pi$ -bridge units on properties of A- $\pi$ -D- $\pi$ -A type nonfullerene acceptors for organic solar cells

Yan-Ling Wang<sup>a, b</sup>, Quan-Song Li<sup>a\*</sup>, Ze-Sheng Li<sup>a\*</sup>

<sup>a</sup> *Key Laboratory of Cluster Science of Ministry of Education, Beijing Key laboratory of Photoelectronic/Electrophotonic Conversion Materials, School of Chemistry and Chemical Engineering, Beijing Institute of Technology, Beijing 100081, China*

<sup>b</sup> *College of Chemical Engineering and Food Science, Hubei University of Arts and Science, Xiangyang, 441053, Hubei Province, P. R. of China*

**\*Corresponding Author**

**E-mail: [liquansong@bit.edu.cn](mailto:liquansong@bit.edu.cn) [zeshengli@bit.edu.cn](mailto:zeshengli@bit.edu.cn)**

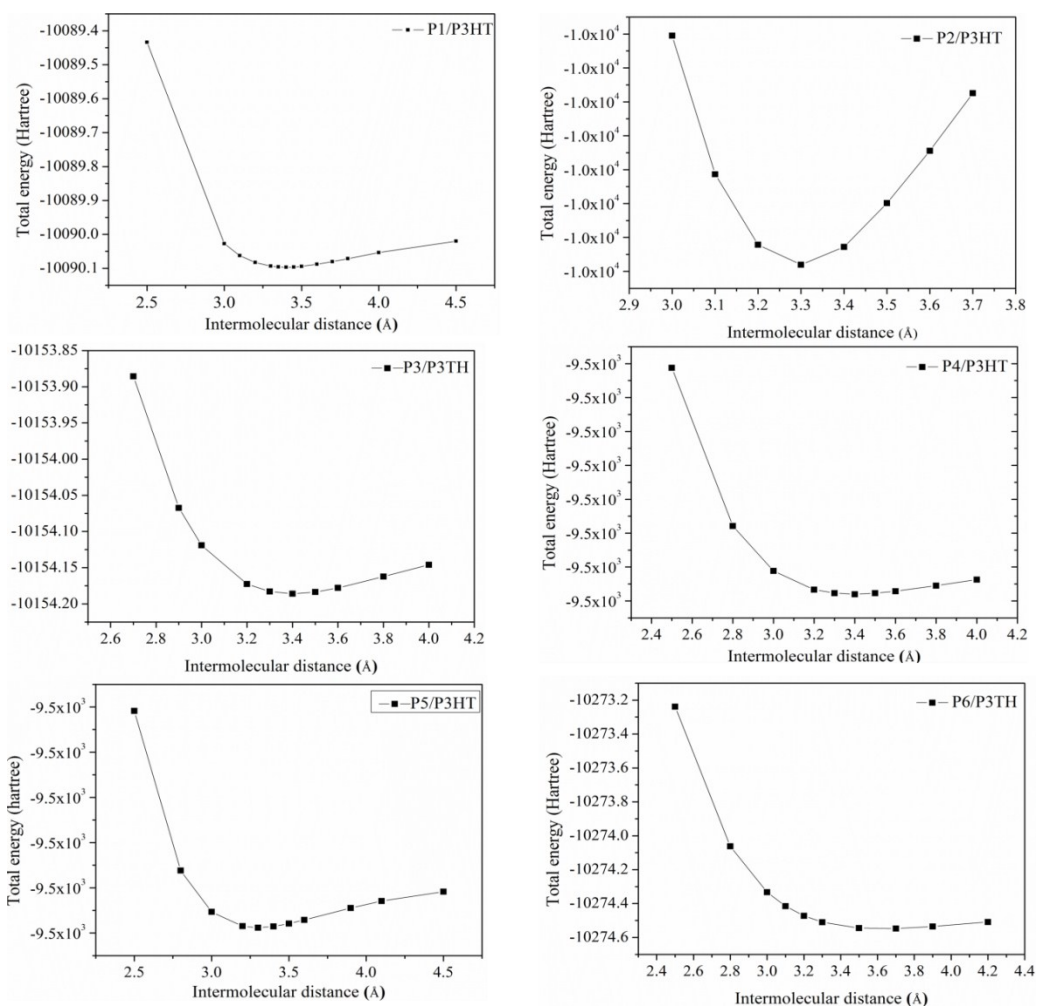

**Fig. S1.** The optimized total energies for adjacent fragments of P3HT/P1-P6 with respect to the intermolecular distance from M06-2X-D3/6-311G (d, p) calculation.

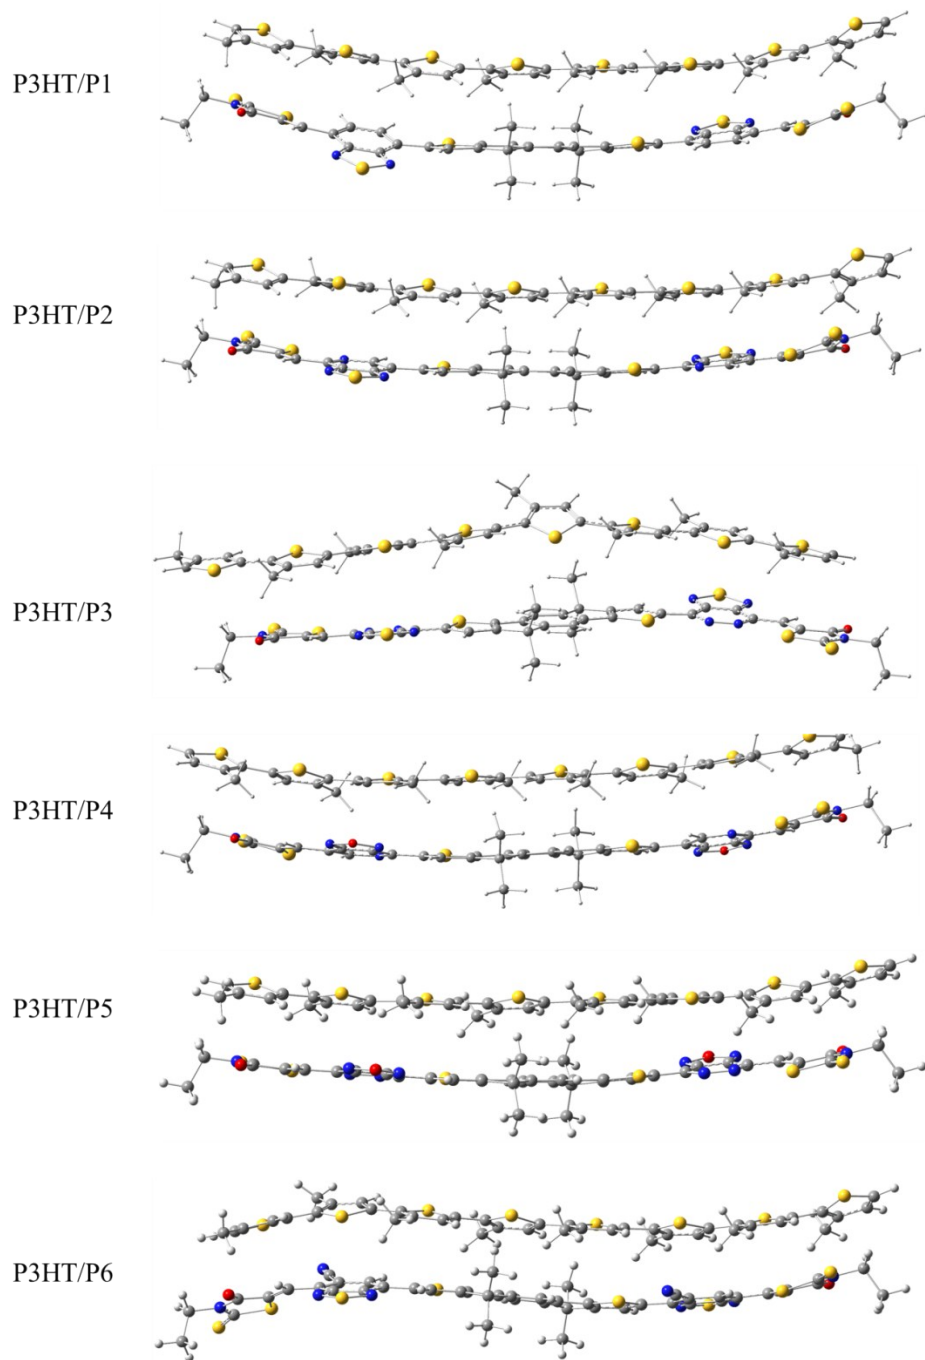

**Fig.S2.** The optimal three-dimensional models for P3HT/P1-P6 blends.

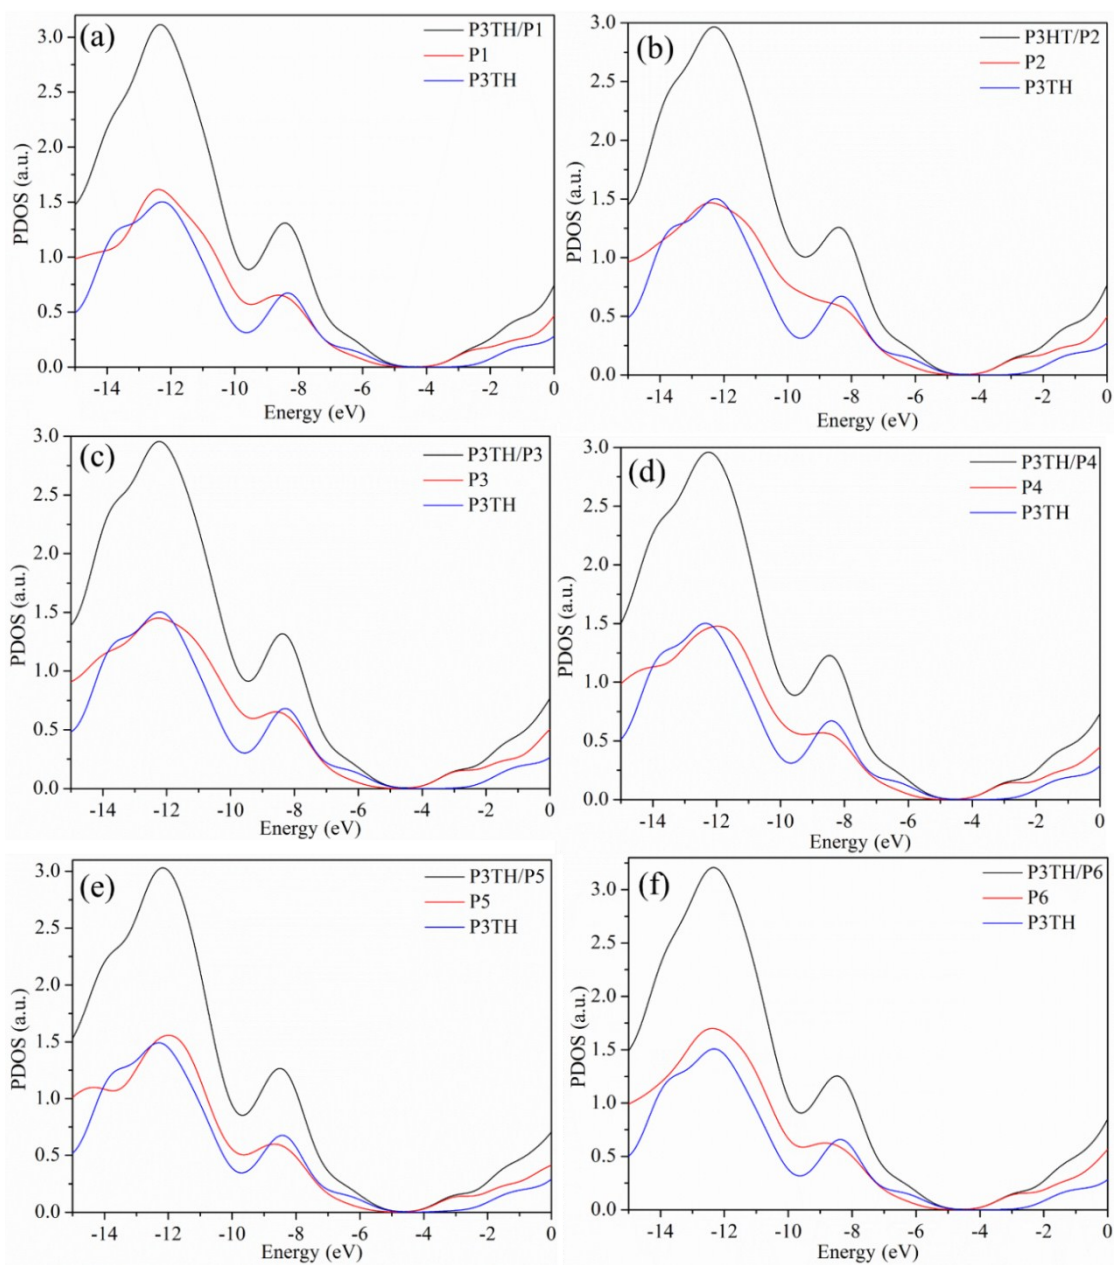

**Fig.S3.** Total densities of states (TDOS) and projected DOS (PDOS) for the donor/acceptor blends of active layers, which (a, b, c, d, e, f) represent P3TH/P1 to P3TH/P6 blends.

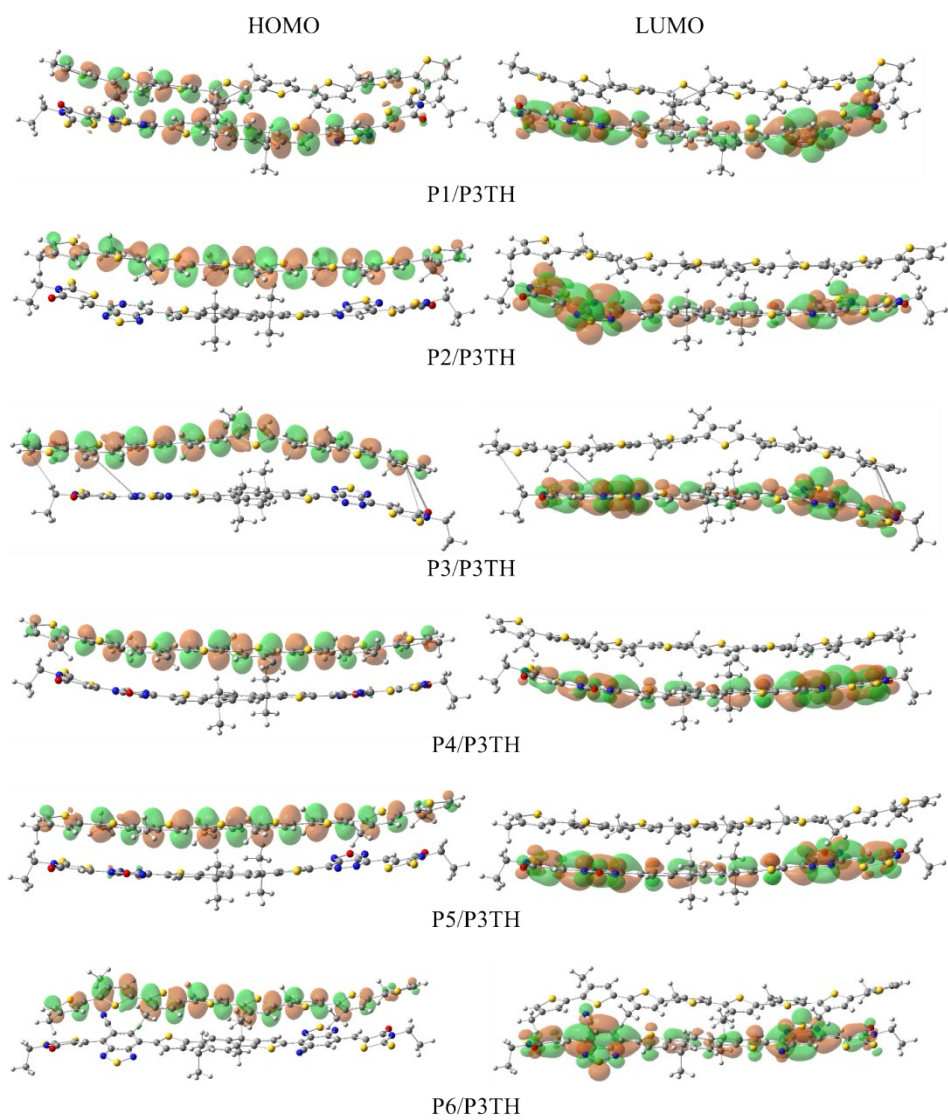

**Fig. S4.** The contour plot of the HOMO and the LUMO orbitals of P3TH/P1-P6 blends.

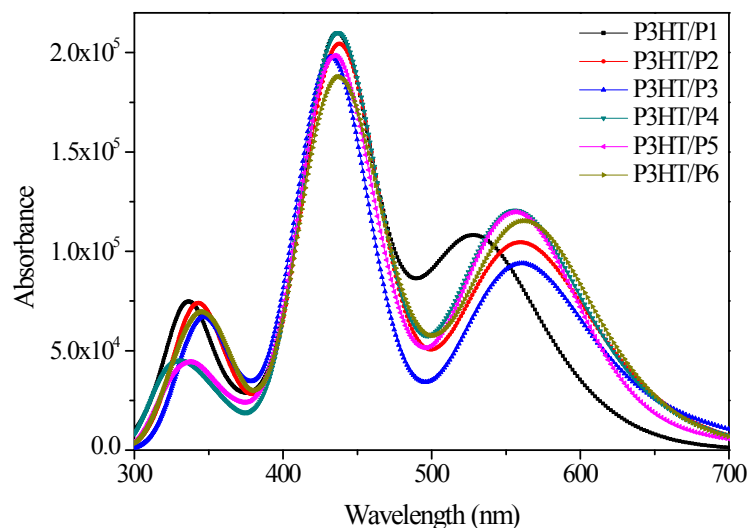

**Fig. S5** Simulated absorption spectra of P3HT/P1-P6 at TD-M06-2X-D3/6-311G(d, p) level.

**Table S1** Selected bond lengths  $L_i$  (Å) and dihedral Angles  $\varphi$  (deg) of all molecules from the PBE0/6-311G (d, p) level calculations, where  $L_1$ - $L_3$  and  $\varphi_1$ - $\varphi_6$  see Fig.1

|    | $L_1$ | $L_2$ | $L_3$ | $\varphi_1$ | $\varphi_2$ | $\varphi_3$ | $\varphi_4$ | $\varphi_5$ | $\varphi_6$ |
|----|-------|-------|-------|-------------|-------------|-------------|-------------|-------------|-------------|
| P1 | 1.35  | 1.43  | 1.44  | 0.17        | 0.99        | 2.28        | 2.61        | 0.84        | 0.17        |
| P2 | 1.35  | 1.43  | 1.43  | 0.22        | 0.33        | 5.44        | -0.29       | -0.17       | 0.05        |
| P3 | 1.35  | 1.43  | 1.43  | 0.00        | 0.04        | 0.06        | 0.10        | 0.04        | 0.00        |
| P4 | 1.35  | 1.42  | 1.43  | 0.26        | 0.59        | 1.95        | -0.68       | -1.64       | 0.65        |
| P5 | 1.35  | 1.43  | 1.42  | 0.16        | 0.27        | 0.23        | 0.09        | 0.30        | 0.02        |
| P6 | 1.35  | 1.43  | 1.44  | 5.19        | 42.5        | 4.32        | 22.9        | -4.74       | 0.45        |

**Table S2** Molecular orbital compositions (%) of donor segments and acceptor segments for all donor-acceptor blends of active layers

|         | Orbital      | H-4   | H-3   | H-2   | H-1   | H     | L     | L+1   | L+2   | L+3   | L+4   |
|---------|--------------|-------|-------|-------|-------|-------|-------|-------|-------|-------|-------|
| P3TH/P1 | Energy (eV)  | -7.33 | -6.94 | -6.66 | -6.32 | -6.05 | -2.63 | -2.47 | -1.57 | -1.39 | -1.35 |
|         | Donor (%)    | 53    | 47    | 73    | 29    | 93    | 2     | 2     | 82    | 10    | 15    |
|         | Acceptor (%) | 47    | 53    | 27    | 71    | 7     | 98    | 98    | 18    | 90    | 85    |
| P3TH/P2 | Energy (eV)  | -7.41 | -6.93 | -6.68 | -6.3  | -6.03 | -2.85 | -2.67 | -1.61 | -1.46 | -1.45 |
|         | Donor (%)    | 43    | 57    | 56    | 45    | 97    | 2     | 2     | 57    | 21    | 24    |
|         | Acceptor (%) | 57    | 43    | 44    | 55    | 3     | 98    | 98    | 43    | 79    | 76    |
| P3TH/P3 | Energy (eV)  | -7.48 | -7.01 | -6.73 | -6.34 | -6.03 | -2.98 | -2.82 | -1.64 | -1.62 | -1.48 |
|         | Donor (%)    | 9     | 95    | 4     | 98    | 99    | 1     | 1     | 4     | 1     | 76    |
|         | Acceptor (%) | 91    | 5     | 96    | 2     | 1     | 99    | 99    | 96    | 99    | 24    |
| P3TH/P4 | Energy (eV)  | -7.53 | -7.04 | -6.81 | -6.43 | -6.12 | -2.98 | -2.77 | -1.68 | -1.53 | -1.45 |
|         | Donor (%)    | 35    | 66    | 47    | 53    | 98    | 2     | 2     | 69    | 36    | 3     |
|         | Acceptor (%) | 65    | 34    | 53    | 47    | 2     | 98    | 98    | 31    | 64    | 97    |
| P3TH/P5 | Energy (eV)  | -7.62 | -7.05 | -6.85 | -6.44 | -6.07 | -3.06 | -2.87 | -1.76 | -1.67 | -1.53 |
|         | Donor (%)    | 30    | 78    | 34    | 69    | 88    | 89    | 7     | 2     | 13    | 64    |
|         | Acceptor (%) | 70    | 22    | 66    | 31    | 12    | 91    | 92    | 73    | 87    | 36    |
| P3TH/P6 | Energy (eV)  | -7.41 | -7.05 | -6.66 | -6.41 | -6.18 | -2.92 | -2.76 | -1.66 | -1.57 | -1.48 |
|         | Donor (%)    | 36    | 65    | 46    | 54    | 98    | 2     | 2     | 43    | 45    | 3     |
|         | Acceptor (%) | 64    | 35    | 54    | 46    | 2     | 98    | 98    | 57    | 55    | 97    |



**Table S3** Calculated excitation energy, oscillator strength ( $f$ ), electronic transition, and main configuration of P3TH/P1-P6 using TD-M06-2X-D3/6-311G(d, p) approach

|         | Excitation energy (eV,<br>nm) | $f$   | transition            | Main<br>configuration     |
|---------|-------------------------------|-------|-----------------------|---------------------------|
| P3HT/P1 | 2.84, 436                     | 2.849 | $S_0 \rightarrow S_5$ | H $\rightarrow$ L+2 (71%) |
| P3HT/P2 | 2.80, 443                     | 2.003 | $S_0 \rightarrow S_5$ | H $\rightarrow$ L+2 (38%) |
| P3HT/P3 | 2.86, 433                     | 1.636 | $S_0 \rightarrow S_8$ | H $\rightarrow$ L+4 (30%) |
| P3HT/P4 | 2.24, 554                     | 1.583 | $S_0 \rightarrow S_3$ | H-2 $\rightarrow$ L (34%) |
| P3HT/P5 | 2.87, 432                     | 2.172 | $S_0 \rightarrow S_9$ | H $\rightarrow$ L+4 (34%) |
| P3HT/P6 | 2.90, 428                     | 1.564 | $S_0 \rightarrow S_7$ | H $\rightarrow$ L+2 (20%) |

**Table S4** Calculated excitation energy, oscillator strength ( $f$ ), electronic transition, light absorption efficiency ( $\eta$ ) and main configuration of P3TH/P1-P6 using TD-PBE0/6-311G(d, p) approach

|             | Excitation energy (eV,<br>nm) | $f$   | transitio<br>n           | Main configuration                                   | $\eta$  |
|-------------|-------------------------------|-------|--------------------------|------------------------------------------------------|---------|
| P3HT/P<br>1 | 2.45, 506                     | 1.186 | $S_0 \rightarrow S_8$    | H $\rightarrow$ L+2 (58%), H-3 $\rightarrow$ L (20%) | 0.9348  |
| P3HT/P<br>2 | 2.33, 532                     | 1.414 | $S_0 \rightarrow S_9$    | H $\rightarrow$ L+3 (44%), H $\rightarrow$ L+2 (28%) | 0.9615  |
| P3HT/P<br>3 | 2.50,497                      | 1.600 | $S_0 \rightarrow S_{14}$ | H $\rightarrow$ L+4 (79%)                            | 0.9749  |
| P3HT/P<br>4 | 2.44,509                      | 2.055 | $S_0 \rightarrow S_9$    | H $\rightarrow$ L+2 (72%)                            | 0.9912  |
| P3HT/P<br>5 | 2.29, 542                     | 1.508 | $S_0 \rightarrow S_9$    | H $\rightarrow$ L+3 (65%)                            | 0.9690  |
| P3HT/P<br>6 | 2.37, 523                     | 1.108 | $S_0 \rightarrow S_9$    | H $\rightarrow$ L+2 (65%)                            | 0.92201 |
